1 **Factors Associated with Receipt and Parental Intent for COVID-19 Vaccination of**  
2 **Children Ages 5–11 years**

3  
4 Tammy A. Santibanez, PhD<sup>a</sup>; Jessica Penn Lendon, PhD<sup>b</sup>; James A. Singleton, PhD<sup>a</sup>; Carla L.  
5 Black, PhD<sup>a</sup>; Tianyi Zhou, MPH<sup>a,c</sup>; Jennifer L. Kriss, PhD<sup>a</sup>; Anurag Jain, MS<sup>a,c</sup>; Laurie D. Elam-  
6 Evans, PhD<sup>a</sup>; Nina B. Masters, PhD<sup>a,d</sup>; Georgina Peacock, MD, MPH<sup>a</sup>

7  
8 **Affiliations:** <sup>a</sup>National Center for Immunization and Respiratory Diseases (NCIRD), CDC;  
9 Atlanta, GA; <sup>b</sup>National Center for Health Statistics (NCHS), CDC; Hyattsville, MD; <sup>c</sup>Leidos  
10 Inc.; Atlanta, GA; <sup>d</sup>Epidemic Intelligence Service, CDC; Atlanta, GA

11  
12  
13 **ABSTRACT**

14 **Background and Objectives**

15 COVID-19 vaccine was first recommended for children ages 5–11 years on November 2, 2021.  
16 This report describes COVID-19 vaccination coverage and parental intent to vaccinate their child  
17 ages 5–11 years, overall, by sociodemographic characteristics, and by social and behavioral  
18 drivers of vaccination, the fourth month after recommendation.

19  
20 **Methods**

21 We analyzed data from 5,438 interviews conducted in February 2022 from the National  
22 Immunization Survey-Child COVID Module (NIS-CCM), a national random-digit-dial cellular  
23 telephone survey of households with children.

24  
25 **Results**

26 30.9% of children ages 5–11 were vaccinated with  $\geq 1$  dose of COVID-19 vaccine, 35.2% were  
27 unvaccinated and the parent reported they probably or definitely would get the child vaccinated  
28 or were unsure, and 33.9% were unvaccinated and the parent probably or definitely would not  
29 get the child vaccinated. Vaccination coverage and parental intent differed by sociodemographic  
30 variables, including income, health insurance status, and rurality. Parental intent to vaccinate  
31 children also differed by ethnicity and race. Concern about the child getting COVID-19 and  
32 confidence in vaccine importance and safety were positively associated with vaccination receipt  
33 and intent to get the child vaccinated.

34  
35 **Conclusions**

36 By the fourth month of the COVID-19 vaccination program for children ages 5–11 years, less  
37 than one-third were vaccinated, and coverage was lower for some sociodemographic subgroups.  
38 An additional one-third of children had a parent who was open to vaccinating the child. Efforts  
39 to address parental concerns regarding vaccine safety and to convey the importance of the  
40 vaccine might improve vaccination coverage.

1 **INTRODUCTION**

2 COVID-19 is usually milder in children than adults; however, children can become  
3 severely ill and require hospitalization and intensive care, and some children have prolonged  
4 illness duration.<sup>1,2</sup> Some children have also contracted multisystem inflammatory syndrome after  
5 infection with COVID-19.<sup>3</sup> Children might play an important role in the transmission of  
6 COVID-19, highlighting the importance of child vaccinations in the effort to reduce COVID-19  
7 community transmission and hospitalization rates.<sup>4</sup> The U.S. Food and Drug Administration  
8 authorized the emergency use of the Pfizer-BioNTech COVID-19 vaccine for children ages 5–11  
9 years in the United States on October 29, 2021, which was endorsed on November 2, 2021, by  
10 the Centers for Disease Control and Prevention (CDC) based on recommendations from the  
11 Advisory Committee on Immunization Practices.<sup>5</sup> Administrative data reported to CDC showed  
12 that coverage among children 5–11 years was 24% during the first two months of vaccine  
13 rollout, which was lower than coverage among those ages 12–15 years (33%) during the first two  
14 months of eligibility for that age group.<sup>6</sup> A report on the safety of the Pfizer-BioNTech COVID-  
15 19 vaccine, the only COVID-19 vaccine authorized for 5-17 year olds, after administration of  
16 approximately 8 million doses to children ages 5–11 years found the vaccine to be safe, with  
17 mild to moderate local and systemic reactions to be expected after vaccination.<sup>7</sup> In two studies  
18 completed within 3–4 months of vaccine authorization, COVID-19 vaccine effectiveness after  
19 two doses among children ages 5–11 years was 31% against asymptomatic and symptomatic  
20 Omicron infection and 46% against COVID-19 associated emergency department and urgent  
21 care encounters.<sup>8,9</sup>

22 The evaluation of disparities in receipt of routine childhood vaccinations is an important  
23 component of the national immunization program in the United States.<sup>10</sup> Understanding

1 sociodemographic differences in COVID-19 vaccination and parental intent to vaccinate children  
2 ages 5–11 years during the first few months after the COVID-19 vaccine recommendation is  
3 essential in efforts to achieve higher vaccination coverage in this age group and addressing  
4 inequities in coverage early in the vaccination program. Better understanding of the associations  
5 between behavioral and social drivers of vaccine uptake and the willingness of parents to  
6 vaccinate their children might help to identify specific issues and demographic subgroups where  
7 tailored efforts might be helpful to improve vaccination coverage.

8         This report describes COVID-19 vaccination coverage among children ages 5–11 years  
9 during the first four months of eligibility and parents’ intent to vaccinate their children, overall  
10 and by sociodemographic characteristics using data from the National Immunization Survey-  
11 Child COVID Module (NIS-CCM). The study also examines variation in several behavioral and  
12 social drivers of COVID-19 vaccination by parents’ intent to vaccinate their children.

13

## 14 **METHODS**

15         The NIS-CCM is a random-digit-dial cellular telephone survey of households with  
16 children ages 5–17 years. The NIS-CCM began on July 22, 2021, including households with  
17 children ages 13–17 years and asking the respondent about the child’s COVID-19 vaccination  
18 status and their intention to vaccinate the child. On October 1<sup>st</sup>, NIS-CCM was expanded to add  
19 children ages 12 and 5–11 years (intent questions only), and on November 2<sup>nd</sup> vaccination status  
20 questions were added for children ages 5–11. The NIS-CCM utilizes the same sampling frame  
21 used for the NIS-Child.<sup>11,12</sup> The respondent to a NIS survey is the parent or guardian of the child  
22 who self-reports as being knowledgeable about the child’s vaccination history (hereafter referred  
23 to as parent).

1 COVID-19 vaccination coverage was based on the parent’s response to the question “Has  
2 [child] received at least one dose of a COVID-19 vaccine?” Parental intent among parents who  
3 reported the child did not receive a vaccine was measured by asking: “How likely are you to get  
4 [child] a COVID-19 vaccine? Would you say you would: definitely get a vaccine for [child];  
5 probably get a vaccine; probably not get a vaccine; definitely not get a vaccine; or are not sure?”  
6 We grouped children as follows: 1) child vaccinated with  $\geq 1$  dose, 2) “child unvaccinated and  
7 parent open to vaccination”, defined as unvaccinated children whose parent reported they  
8 definitely or probably will get the child vaccinated or were unsure, and 3) “child unvaccinated  
9 and parent reluctant to vaccinate”, defined as unvaccinated children whose parent reported they  
10 definitely or probably will not get the child vaccinated.

11 Further, in order to control for the effect that any increasing vaccination coverage in a  
12 group has in depleting the proportion with high intent in the pool of those still unvaccinated  
13 (because of them getting vaccinated over time), we created an additional variable called  
14 “willingness” to get the child vaccinated with COVID-19 vaccine. “Willingness” included  
15 parents who already had the child vaccinated (they are willing to get the child vaccinated, as  
16 evidenced by them doing so) and parents open to vaccination (i.e. parents with unvaccinated  
17 children who definitely or probably will get the child vaccinated or were unsure). Parents who  
18 reported that the child had received COVID-19 vaccination were asked the kind of place where  
19 the child received the vaccination. All information about the parent, child, and household was  
20 self-reported by the parent respondent.

21 The variables describing potential drivers of COVID-19 vaccine uptake are derived from  
22 the Behavioral and Social Drivers of Vaccination (BeSD) Framework.<sup>13</sup> The domains and  
23 associated survey questions were:

- 1     ▪ *Thinking and Feeling:*
- 2             • “How concerned are you about [child’s name] getting COVID-19?” “Not at all
- 3             concerned, a little concerned, moderately concerned, or very concerned.”
- 4             • “How important do you think getting a COVID-19 vaccine is to protect [child’s name]
- 5             against COVID-19?” “Not at all important, a little important, somewhat important, or
- 6             very important”
- 7             • “How safe do you think a COVID-19 vaccine is for [child’s name]?” “Not at all safe,
- 8             somewhat safe, very safe, or completely safe”.
- 9     ▪ *Social Processes:*
- 10            • “If you had to guess, about how many of your family and friends have gotten a COVID-
- 11            19 vaccine for their children ages 5–11 years?” “None, some, many, or almost all.”
- 12            • “Has a doctor, nurse, or another health professional ever recommended that you get a
- 13            COVID-19 vaccine for [child’s name]” “Yes or no.”
- 14            • “Does [child’s name]’s school require a COVID-19 vaccine to attend in-person
- 15            classes?” “Yes or no.”
- 16     ▪ *Practical Issues:*
- 17            • “How difficult would it be/was it for you to get [child’s name] a COVID-19 vaccine?”
- 18            “Not at all difficult, a little difficult, somewhat difficult, or very difficult.”
- 19

20            Data from interviews conducted from January 30 through February 26, 2022, were

21 analyzed. There were 5,496 completed parent interviews for children ages 5–11 years. Of these,

22 35 were missing vaccination status, and 23 of the unvaccinated children did not have vaccination

23 intent reported for the child, for a resulting analytic sample of n=5,438. The cumulative NIS-

1 CCM response rate was 15.1%. Weighted proportions with 95% confidence intervals (CIs) were  
2 estimated considering the complex survey design and weights by using SAS-callable SUDAAN  
3 (version 11.0.3, RTI) and SAS version 9.4 (SAS Institute, Inc.). The NIS-CCM survey weights  
4 adjust for non-response and households without cellular telephones and were calibrated to match  
5 counts of children with one or more doses of COVID-19 vaccine by sex within each U.S.  
6 Department of Health and Human Services (HHS) region for children ages 5–11 years as of mid-  
7 month, using data reported to CDC by jurisdictions.<sup>6</sup> T-tests for proportions were used to test for  
8 statistically significant differences with  $p < 0.05$ . The NCHS reliability criteria for proportions  
9 was implemented and proportions not meeting the criteria were suppressed from the tables.<sup>14</sup>

10

## 11 **RESULTS**

12 Figure 1 shows the distribution of children across six levels of vaccination and intent,  
13 including vaccinated with at least one dose, and each of the five levels of intent for unvaccinated  
14 children included in the survey question. COVID-19 vaccination coverage among children ages  
15 5–11 years increased from 8.0% in November 2021 to 20.7% in December 2021, 27.6% in  
16 January 2022, and 30.9% in February 2022 (Figure 1). In February, 35.2% were unvaccinated  
17 and the parent reported they probably or definitely would get the child vaccinated or were  
18 unsure, and 33.9% were unvaccinated and the parent probably or definitely would not get the  
19 child vaccinated. The places that children ages 5–11 years received their vaccinations were:  
20 medical place (46.4% [specifically: 23.3% doctor’s office, 12.4% clinic/health center, 6.5%  
21 hospital, 3.4% health department, 0.9% other medical place]), pharmacy/drug store (38.3%),  
22 school (7.5%), mass vaccination site (5.3%), or another non-medical place (2.6%; data not  
23 shown).

1 Child's receipt of  $\geq 1$  dose of COVID-19 vaccine and parents' willingness to get their  
2 child vaccinated with COVID-19 vaccine varied by sociodemographic characteristics (Table 1).  
3 A higher percentage of children ages 7–8 years (29.5%) and 9–11 years (34.4%) were vaccinated  
4 compared to children ages 5–6 years (26.0%), yet there were no age differences in parents'  
5 willingness to get their child vaccinated (Table 1). There were no differences in the percentage of  
6 Hispanic or Black non-Hispanic children receiving  $\geq 1$  dose compared with White non-Hispanic  
7 children; however, there was a higher willingness to vaccinate among parents of Black non-  
8 Hispanic children (72.7%) and Hispanic children (71.4%) compared with White non-Hispanic  
9 children (57.9%, Table 1). The highest vaccination coverage (68.7%) and parental willingness to  
10 vaccinate (92.9%) was among parents of Asian non-Hispanic children.

11 A lower percentage of children received COVID-19 vaccination in households above  
12 poverty with income  $\leq$  \$75,000 (23.1%) and below the poverty level (22.1%) compared with  
13 children in households above poverty with income  $>$  \$75,000 (36.9%); however, there was no  
14 difference in willingness to vaccinate by income (range 63-68% across income levels). A higher  
15 proportion of children with non-Medicaid health insurance received COVID-19 vaccination  
16 (35.0%) compared with Medicaid-insured children (24.3%), while uninsured children had similar  
17 coverage to Medicaid-insured children (25.9%); there were no differences in willingness to  
18 vaccinate by insurance status. Among children who did not receive an influenza vaccination  
19 since July 2021, 16.4% received a COVID-19 vaccine compared with 51.0% of children who  
20 had received an influenza vaccination. A lower proportion of children living in rural areas were  
21 vaccinated (16.6%) than children living in urban areas (34.3%), and there was a lower  
22 willingness to vaccinate in rural (46.5%) and suburban (65.8%) areas compared with urban areas  
23 (73.2%). There were also differences in vaccination coverage and willingness to vaccinate by

1 county-level characteristics and by HHS region (see Table 1). The study also found variation by  
2 sociodemographic characteristics in parents' openness and reluctance to vaccinate children who  
3 were unvaccinated, as shown in Table 1.

4         There were strong associations between social and behavioral drivers and the child's  
5 receipt of  $\geq 1$  dose of COVID-19 vaccine and parental intent to vaccinate the child (Figure 2).  
6 Parents who were reluctant (reported that they definitely or probably would *not* get their child  
7 vaccinated) were less likely to report they were very/moderately concerned about the child  
8 getting COVID-19 when compared to parents of vaccinated children (23.6% vs 56.8%), were  
9 less likely to report that getting a COVID-19 vaccine was somewhat/very important (16.0% vs  
10 95.9%), less likely to report that COVID-19 vaccine is completely/very safe (7.1% vs 80.0%),  
11 less likely to report that almost all/many friends/family have their child vaccinated (6.0% vs  
12 63.6%), and less likely to report a provider recommendation for COVID-19 vaccine (18.4% vs  
13 56.6%). Parents who were open to vaccinating their child, but had not yet vaccinated them  
14 (reported that they were definitely/probably/unsure), were less likely to report that getting a  
15 COVID-19 vaccine was somewhat/very important when compared to parents of vaccinated  
16 children (77.6% vs 95.9%), less likely to report that COVID-19 vaccine is completely/very safe  
17 (38.3% vs 80.0%), perception of fewer friends/family having their child vaccinated (16.0% vs  
18 63.6%), and less likely to report a provider recommendation for COVID-19 vaccine (24.0% vs  
19 56.6%).

20         Table 2 describes the behavioral and social drivers for COVID-19 vaccination among the  
21 subset of unvaccinated children whose parents were open to vaccination. Hispanic children in  
22 this group had a higher percentage of parent-reported concern about the child getting COVID-19  
23 (58.4%), but a lower percentage of confidence in the safety of the vaccine (29.7%) than among



1 White non-Hispanic children (44.1% and 45.2%, respectively). Among unvaccinated Black non-  
2 Hispanic children whose parent was open to vaccination, there was a higher percentage of  
3 parent-reported concern about the child getting COVID-19 (67.8%) and perceived importance of  
4 the vaccine (88.2%) than among White non-Hispanic unvaccinated children (44.1% and 71.3%,  
5 respectively). For children who had a mother with a college degree, the respondents were more  
6 confident in the vaccine's safety than those with  $\leq$  high school education (50.4% vs 30.3%) and  
7 had higher reported provider recommendations for COVID-19 vaccination (30.7% vs 18.3%).  
8 Other sociodemographic differences are reported in Table 2.

9

## 10 **DISCUSSION**

11 This study found that less than one-third of children ages 5–11 years had received a  
12 COVID-19 vaccination by the fourth month after the vaccine was recommended for this age  
13 group. The lower uptake for this age group was similarly reported in other studies.<sup>6,15</sup> We found  
14 that an additional 35.2% of children had parents who were open to vaccination. These parents  
15 could potentially be encouraged to vaccinate their child if vaccine confidence was increased, and  
16 access issues were reduced or removed.<sup>16,17</sup> The 33.9% of children with parents who were  
17 reluctant to get their child vaccinated are not likely to get vaccinated without a larger shift in the  
18 parents' beliefs.<sup>18</sup>

19 This study found no differences in COVID-19 vaccination coverage between Hispanic or  
20 Black non-Hispanic children compared with White non-Hispanic children. This absence of  
21 racial/ethnic disparity is encouraging and might be a result of the efforts at outreach to  
22 communities to promote and increase access to vaccination.<sup>15,17</sup> Estimates available earlier in the  
23 vaccination program showed there might have been some racial/ethnic differences, but they had

1 narrowed by February 2022 when the data for this study were collected.<sup>6,19</sup> It is less encouraging  
2 that COVID-19 vaccination coverage was low (< 40%) for all racial/ethnic groups, except for  
3 Asian non-Hispanic children. The higher COVID-19 vaccination coverage among Asian non-  
4 Hispanic children is consistent with other studies and with what has been found for influenza  
5 vaccination.<sup>6,20</sup>

6 We did find disparities by household income and by health insurance status. Children in  
7 lower-income families had COVID-19 vaccination coverage that was approximately 15  
8 percentage points lower than those in a higher-income household, yet the parents in these lower-  
9 income households were as willing to have their children vaccinated as were those in the higher-  
10 income households. This indicates possible structural access barriers to COVID-19 vaccination  
11 among lower-income children. Likewise, we found that children who were Medicaid-insured or  
12 uninsured had COVID-19 vaccination coverage that was approximately 10 percentage points  
13 lower than children with private or other non-Medicaid health insurance, with no differences in  
14 parental willingness to get the child vaccinated by insurance coverage. This disparity could be  
15 associated with the difficulty of enrolling Vaccines for Children (VFC) providers, who serve  
16 children that are uninsured or Medicaid-insured, to stock and administer COVID-19 vaccines.  
17 Given changes in coverage of administration fees for vaccination of uninsured people that took  
18 effect on April 5, 2022, these disparities might become wider in the future, perhaps more so for  
19 children without a medical home; however, only a small proportion of children are uninsured.<sup>21</sup>  
20 Any interventions to reduce access barriers to COVID-19 vaccination for young children, such as  
21 vaccinations offered in school settings or increasing the availability of vaccinators during  
22 convenient hours for working parents, should be encouraged.<sup>17</sup>

1 The behavioral and social driver variables that were most different between children already  
2 vaccinated compared to unvaccinated children whose parent was open to getting them vaccinated  
3 were concerns about vaccine safety, perceptions of how many friends and family were getting  
4 their children vaccinated, and provider recommendations for COVID-19 vaccination. The lower  
5 confidence in vaccine safety was even more prevalent among Hispanic parents. Discussions with  
6 trusted messengers, such as the child's pediatrician or community and faith-based leaders, might  
7 help allay parents' concerns.<sup>22</sup> This might also increase parental perception that the social norm  
8 is to have children vaccinated with all CDC-recommended childhood vaccines, even if this is not  
9 true within their immediate circle of friends and families. The finding of a lower percentage of  
10 provider recommendations among unvaccinated children compared to vaccinated children  
11 suggests that outreach to pediatricians and other medical providers for young children might be  
12 needed to encourage them to use every opportunity to strongly recommend COVID-19  
13 vaccination for their patients, as is recommended for other childhood vaccinations. This is  
14 especially important for VFC providers who are serving Medicaid and uninsured children.  
15 Children without a medical home are likely missing out on the opportunity to receive a provider  
16 recommendation, emphasizing the importance of all children having a medical home.  
17 Furthermore, providers that not only recommend vaccines for their patients but also offer  
18 vaccines during the visit have been shown to result in higher vaccination coverage levels.<sup>23</sup>  
19 Improving the availability of COVID-19 vaccines at provider offices would help increase  
20 coverage. Other evidence-based approaches for providers include integrating vaccination into  
21 standard medical practice and sending reminders to parents; given less than 10% of children in  
22 this study were reported to be vaccinated at school, expanded school-located vaccination  
23 programs could be considered.<sup>17</sup>

1 This study is subject to at least four limitations. First, the response rates were low (15%) and  
2 bias in estimates might remain after weighting. Survey weights were therefore calibrated to the  
3 COVID-19 vaccine administration data by region, age group, and sex to mitigate possible bias  
4 from incomplete sample frame and nonresponse. Second, vaccination status was parent-reported  
5 and subject to recall bias and social desirability bias. However, recall bias of the child's  
6 vaccination status might be reduced given the recency of the event (<4 months). While  
7 calibration to the COVID-19 vaccine administration data does not correct for misclassification of  
8 vaccination status on an individual level, it does mitigate impact of this misclassification on  
9 estimates of vaccination coverage. Third, we defined the shorthand term "willingness" to  
10 vaccinate the child to include parents who already had the child vaccinated plus those whose  
11 child was unvaccinated but they said they definitely or probably or were unsure they would get  
12 the child vaccinated, however these reported intentions might not translate to actual willingness  
13 to have the child vaccinated. Semantic arguments might also be presented for including the  
14 already vaccinated as willing, however other shorthand words/phrases had their own limitations.  
15 Finally, the survey is cross-sectional, so cause and effect relationships cannot be determined.

16

## 17 **CONCLUSION**

18 By the fourth month of the COVID-19 vaccination program for children ages 5–11 years,  
19 slightly less than one-third were vaccinated and coverage was even lower for some  
20 sociodemographic subgroups. An additional one-third of children had a parent who was open to  
21 vaccination for the child. There were variations in vaccination coverage and parental intent by  
22 several sociodemographic characteristics and in the potential drivers of vaccination. Efforts to  
23 address parental concerns regarding vaccine safety and to convey the importance of the vaccine

1 might improve vaccination coverage. This study also suggests health-care provider  
2 recommendation of COVID-19 vaccines and discussions with trusted messengers might also  
3 improve coverage among children ages 5-11 years.<sup>17</sup>

4

5

6 **DISCLAIMER**

7           The findings and conclusions in this report are those of the authors and do not necessarily  
8 represent the official position of the Centers for Disease Control and Prevention. The use of trade  
9 names and commercial sources is for identification only and does not imply endorsement by the  
10 U.S. Department of Health and Human Services.

11

12

13

14

15

16

17

## REFERENCES

1. Kim L, Whitaker M, O'Halloran A, et al. Hospitalization Rates and Characteristics of Children Aged <18 Years Hospitalized with Laboratory-Confirmed COVID-19 - COVID-NET, 14 States, March 1-July 25, 2020. *MMWR Morbidity and mortality weekly report*. Aug 14 2020;69(32):1081-1088. doi:10.15585/mmwr.mm6932e3
2. Molteni E, Sudre CH, Canas LS, et al. Illness duration and symptom profile in symptomatic UK school-aged children tested for SARS-CoV-2. *The Lancet Child & adolescent health*. Oct 2021;5(10):708-718. doi:10.1016/s2352-4642(21)00198-x
3. CDC. Multisystem Inflammatory Syndrome in Children (MIS-C) Associated with Coronavirus Disease 2019 (COVID-19). Accessed 3/7/2022, <https://emergency.cdc.gov/han/2020/han00432.asp>
4. Szablewski CM, Chang KT, Brown MM, et al. SARS-CoV-2 Transmission and Infection Among Attendees of an Overnight Camp - Georgia, June 2020. *MMWR Morbidity and mortality weekly report*. Aug 7 2020;69(31):1023-1025. doi:10.15585/mmwr.mm6931e1
5. Woodworth KR, Moulia D, Collins JP, et al. The Advisory Committee on Immunization Practices' Interim Recommendation for Use of Pfizer-BioNTech COVID-19 Vaccine in Children Aged 5-11 Years - United States, November 2021. *MMWR Morbidity and mortality weekly report*. Nov 12 2021;70(45):1579-1583. doi:10.15585/mmwr.mm7045e1
6. Murthy NC, Zell E, Fast HE, et al. Disparities in First Dose COVID-19 Vaccination Coverage among Children 5-11 Years of Age, United States. *Emerg Infect Dis*. Feb 28 2022;28(5)doi:10.3201/eid2805.220166
7. Hause AM, Baggs J, Marquez P, et al. COVID-19 Vaccine Safety in Children Aged 5-11 Years - United States, November 3-December 19, 2021. *MMWR Morbidity and mortality weekly report*. Dec 31 2021;70(5152):1755-1760. doi:10.15585/mmwr.mm705152a1
8. Fowlkes AL, Yoon SK, Lutrick K, et al. Effectiveness of 2-Dose BNT162b2 (Pfizer BioNTech) mRNA Vaccine in Preventing SARS-CoV-2 Infection Among Children Aged 5-11 Years and Adolescents Aged 12-15 Years - PROTECT Cohort, July 2021-February 2022. *MMWR Morbidity and mortality weekly report*. Mar 18 2022;71(11):422-428. doi:10.15585/mmwr.mm7111e1
9. Klein NP, Stockwell MS, Demarco M, et al. Effectiveness of COVID-19 Pfizer-BioNTech BNT162b2 mRNA Vaccination in Preventing COVID-19-Associated Emergency Department and Urgent Care Encounters and Hospitalizations Among Nonimmunocompromised Children and Adolescents Aged 5-17 Years - VISION Network, 10 States, April 2021-January 2022. *MMWR Morbidity and mortality weekly report*. Mar 4 2022;71(9):352-358. doi:10.15585/mmwr.mm7109e3
10. Roper L, Hall MAK, Cohn A. Overview of the United States' Immunization Program. *The Journal of infectious diseases*. Sep 30 2021;224(12 Suppl 2):S443-s451. doi:10.1093/infdis/jiab310
11. Wolter KK, Smith PJ, Khare M, et al. Statistical Methodology of the National Immunization Survey, 2005-2014. *Vital and health statistics Ser 1, Programs and collection procedures*. Dec 2017;(61):1-107.
12. CDC. About the National Immunization Surveys (NIS). Accessed 3/7/2022, <https://www.cdc.gov/vaccines/imz-managers/nis/about.html>

13. Wiley KE, Levy D, Shapiro GK, et al. A user-centered approach to developing a new tool measuring the behavioural and social drivers of vaccination. *Vaccine*. Oct 8 2021;39(42):6283-6290. doi:10.1016/j.vaccine.2021.09.007
14. Parker JD, Talih M, Malec DJ, et al. National Center for Health Statistics Data Presentation Standards for Proportions. *Vital and health statistics Series 2, Data evaluation and methods research*. Aug 2017;(175):1-22.
15. Kim C, Yee R, Bhatkoti R, et al. COVID-19 Vaccine Provider Access and Vaccination Coverage Among Children Aged 5-11 Years - United States, November 2021-January 2022. *MMWR Morbidity and mortality weekly report*. Mar 11 2022;71(10):378-383. doi:10.15585/mmwr.mm7110a4
16. Shen SC, Dubey V. Addressing vaccine hesitancy: Clinical guidance for primary care physicians working with parents. *Canadian family physician Medecin de famille canadien*. Mar 2019;65(3):175-181.
17. CDC. 12 COVID-19 Vaccination Strategies for Your Community. Accessed 4/1/2022, <https://www.cdc.gov/vaccines/covid-19/vaccinate-with-confidence/community.html>
18. Witteman HO. Addressing Vaccine Hesitancy With Values. *Pediatrics*. Aug 2015;136(2):215-7. doi:10.1542/peds.2015-0949
19. CDC. COVIDVaxView. Accessed 4/1/2022, <https://www.cdc.gov/vaccines/imz-managers/coverage/covidvaxview/index.html>
20. CDC. Flu Vaccination Coverage, United States, 2020–21 Influenza Season. Accessed 3/13/2022, <https://www.cdc.gov/flu/fluview/coverage-2021estimates.htm>
21. Administration HHS. HRSA COVID-19 Uninsured Program Claims Submission Deadline FAQs. Accessed 4/1/2022, <https://www.hrsa.gov/coviduninsuredclaim/submission-deadline>
22. Osakwe ZT, Osborne JC, Osakwe N, Stefancic A. Facilitators of COVID-19 vaccine acceptance among Black and Hispanic individuals in New York: A qualitative study. *American journal of infection control*. 2022/03/01/ 2022;50(3):268-272. doi:<https://doi.org/10.1016/j.ajic.2021.11.004>
23. Ding H, Black CL, Ball S, et al. Influenza Vaccination Coverage Among Pregnant Women - United States, 2016-17 Influenza Season. *MMWR Morbidity and mortality weekly report*. Sep 29 2017;66(38):1016-1022. doi:10.15585/mmwr.mm6638a2

**Table 1. Sociodemographic Characteristics Associated with COVID-19 Vaccination Status and Intention of Parents to Vaccinate Children ages 5–11 years, February 2022, United States, National Immunization Survey-Child COVID Module (NIS-CCM)**

| Characteristic                                    | n <sup>a</sup> | Percentage of Children Within Each of the Three Groups of Vaccination and Intention to Vaccinate |             |                                                                                                |             |                                                                                         |             | Percentage of Children with Parent Willing to Get Them Vaccinated |                                                                   |             |
|---------------------------------------------------|----------------|--------------------------------------------------------------------------------------------------|-------------|------------------------------------------------------------------------------------------------|-------------|-----------------------------------------------------------------------------------------|-------------|-------------------------------------------------------------------|-------------------------------------------------------------------|-------------|
|                                                   |                | Child Vaccinated With ≥1 Dose COVID-19 Vaccine                                                   |             | Child Unvaccinated and Parent Open to Vaccination (definitely/probably will get or are unsure) |             | Child Unvaccinated and Parent Reluctant to Vaccinate (definitely/probably will not get) |             | Total                                                             | Already Vaccinated or Unvaccinated and Parent Open to Vaccination |             |
|                                                   |                | %                                                                                                | (95% CI)    | %                                                                                              | (95% CI)    | %                                                                                       | (95% CI)    |                                                                   | %                                                                 | (95% CI)    |
| <b>Overall</b>                                    | 5438           | 30.9                                                                                             | (28.8-33.0) | 35.2                                                                                           | (32.7-37.7) | 33.9                                                                                    | (31.5-36.4) | 100                                                               | 66.1                                                              | (63.6-68.5) |
| <b>Child's Age Group</b>                          |                |                                                                                                  |             |                                                                                                |             |                                                                                         |             |                                                                   |                                                                   |             |
| 5–6 years (Referent)                              | 1458           | 26.0                                                                                             | (22.2-30.1) | 39.1                                                                                           | (34.4-44.0) | 34.9                                                                                    | (30.5-39.5) | 100                                                               | 65.1                                                              | (60.5-69.5) |
| 7–8 years                                         | 1464           | *29.5                                                                                            | (25.6-33.6) | 33.7                                                                                           | (29.0-38.7) | 36.8                                                                                    | (31.8-42.0) | 100                                                               | 63.2                                                              | (58.0-68.2) |
| 9–11 years                                        | 2516           | *34.4                                                                                            | (31.2-37.7) | 33.9                                                                                           | (30.2-37.7) | 31.7                                                                                    | (28.2-35.4) | 100                                                               | 68.3                                                              | (64.6-71.8) |
| <b>Child's Race/Ethnicity<sup>b</sup></b>         |                |                                                                                                  |             |                                                                                                |             |                                                                                         |             |                                                                   |                                                                   |             |
| Hispanic                                          | 972            | 32.8                                                                                             | (27.8-38.1) | *38.6                                                                                          | (33.2-44.4) | *28.6                                                                                   | (23.3-34.2) | 100                                                               | *71.4                                                             | (65.8-76.7) |
| Black, non-Hispanic                               | 600            | 26.6                                                                                             | (21.8-31.8) | *46.1                                                                                          | (39.5-52.8) | *27.3                                                                                   | (21.6-33.7) | 100                                                               | *72.7                                                             | (66.3-78.4) |
| White, non-Hispanic (Referent)                    | 3110           | 27.9                                                                                             | (25.4-30.4) | 30.1                                                                                           | (27.0-33.3) | 42.1                                                                                    | (38.8-45.4) | 100                                                               | 57.9                                                              | (54.6-61.2) |
| Asian, non-Hispanic                               | 313            | *68.7                                                                                            | (53.5-81.5) | 24.1                                                                                           | (12.3-39.8) | --                                                                                      | --          | 100                                                               | *92.9                                                             | (82.2-98.2) |
| Multiple races/other, non-Hispanic                | 443            | 34.7                                                                                             | (26.8-43.4) | 39.0                                                                                           | (30.3-48.2) | *26.3                                                                                   | (19.1-34.5) | 100                                                               | *73.7                                                             | (65.5-80.9) |
| <b>Child's Sex</b>                                |                |                                                                                                  |             |                                                                                                |             |                                                                                         |             |                                                                   |                                                                   |             |
| Male (Referent)                                   | 2828           | 30.6                                                                                             | (27.7-33.7) | 34.2                                                                                           | (30.8-37.7) | 35.2                                                                                    | (31.8-38.7) | 100                                                               | 64.8                                                              | (61.3-68.2) |
| Female                                            | 2610           | 31.2                                                                                             | (28.2-34.2) | 36.2                                                                                           | (32.6-39.9) | 32.7                                                                                    | (29.2-36.2) | 100                                                               | 67.3                                                              | (63.8-70.8) |
| <b>Household Income/Poverty Level<sup>c</sup></b> |                |                                                                                                  |             |                                                                                                |             |                                                                                         |             |                                                                   |                                                                   |             |
| >Poverty, >\$75,000/year (Referent)               | 2480           | 36.9                                                                                             | (33.4-40.5) | 30.0                                                                                           | (26.3-33.9) | 33.1                                                                                    | (29.2-37.1) | 100                                                               | 66.9                                                              | (62.9-70.8) |
| >Poverty, ≤\$75,000/year                          | 1246           | *23.1                                                                                            | (19.4-27.1) | *40.3                                                                                          | (35.3-45.3) | 36.7                                                                                    | (31.8-41.8) | 100                                                               | 63.3                                                              | (58.2-68.2) |
| Below poverty level                               | 478            | *22.1                                                                                            | (16.7-28.4) | *42.7                                                                                          | (35.0-50.7) | 35.2                                                                                    | (27.9-43.0) | 100                                                               | 64.8                                                              | (57.0-72.1) |
| Income not reported                               | 1234           | 35.0                                                                                             | (30.4-39.8) | 33.4                                                                                           | (28.3-38.7) | 31.6                                                                                    | (26.9-36.7) | 100                                                               | 68.4                                                              | (63.3-73.1) |
| <b>Mother's Education Level</b>                   |                |                                                                                                  |             |                                                                                                |             |                                                                                         |             |                                                                   |                                                                   |             |
| < High school (Referent)                          | 265            | 22.4                                                                                             | (15.3-30.9) | 54.2                                                                                           | (44.7-63.5) | 23.4                                                                                    | (16.4-31.7) | 100                                                               | 76.6                                                              | (68.3-83.6) |
| High school or equivalent                         | 962            | 18.3                                                                                             | (15.0-22.1) | *37.7                                                                                          | (32.5-43.2) | *43.9                                                                                   | (38.4-49.6) | 100                                                               | *56.1                                                             | (50.4-61.6) |
| Some college/vocational school                    | 1342           | 26.7                                                                                             | (23.0-30.6) | *33.8                                                                                          | (29.5-38.3) | *39.6                                                                                   | (35.1-44.1) | 100                                                               | *60.4                                                             | (55.9-64.9) |
| ≥ College degree                                  | 2869           | *45.9                                                                                            | (42.3-49.5) | *28.2                                                                                          | (24.6-31.9) | 25.9                                                                                    | (22.5-29.7) | 100                                                               | 74.1                                                              | (70.3-77.5) |
| <b>Number of Children Under 18 in house</b>       |                |                                                                                                  |             |                                                                                                |             |                                                                                         |             |                                                                   |                                                                   |             |
| 1 child (Referent)                                | 1882           | 29.4                                                                                             | (25.7-33.3) | 39.5                                                                                           | (34.6-44.5) | 31.2                                                                                    | (26.8-35.8) | 100                                                               | 68.8                                                              | (64.2-73.2) |
| 2 children                                        | 3235           | 33.1                                                                                             | (30.4-35.9) | 33.9                                                                                           | (30.9-37.1) | 33.0                                                                                    | (30.0-36.2) | 100                                                               | 67.0                                                              | (63.8-70.0) |
| 3+ children                                       | 321            | *21.9                                                                                            | (15.9-28.9) | 33.9                                                                                           | (26.2-42.3) | *44.2                                                                                   | (36.1-52.6) | 100                                                               | *55.8                                                             | (47.4-63.9) |



|                                                             |      |       |             |       |             |       |             |     |       |             |
|-------------------------------------------------------------|------|-------|-------------|-------|-------------|-------|-------------|-----|-------|-------------|
| <b>Health Insurance<sup>d</sup></b>                         |      |       |             |       |             |       |             |     |       |             |
| Medicaid (Referent)                                         | 1105 | 24.3  | (20.1-28.9) | 40.5  | (35.4-45.7) | 35.2  | (30.2-40.4) | 100 | 64.8  | (59.6-69.8) |
| Non-Medicaid Insurance                                      | 3926 | *35.0 | (32.4-37.6) | *31.8 | (28.8-34.8) | 33.3  | (30.3-36.3) | 100 | 66.7  | (63.7-69.7) |
| Uninsured                                                   | 211  | 25.9  | (16.7-37.0) | 41.6  | (28.9-55.1) | 32.5  | (21.2-45.5) | 100 | 67.5  | (54.5-78.8) |
| <b>Child ever had COVID-19 illness<sup>c</sup></b>          |      |       |             |       |             |       |             |     |       |             |
| Yes (Referent)                                              | 1773 | 24.6  | (21.5-28.0) | 36.2  | (32.0-40.5) | 39.2  | (34.9-43.5) | 100 | 60.8  | (56.5-65.1) |
| No                                                          | 3603 | *34.9 | (32.2-37.8) | 34.3  | (31.2-37.4) | *30.8 | (27.8-33.9) | 100 | *69.2 | (66.1-72.2) |
| <b>Flu vaccination received since July 1, 2021</b>          |      |       |             |       |             |       |             |     |       |             |
| Received 1+ flu (Referent)                                  | 2905 | 51.0  | (47.4-54.6) | 32.5  | (28.9-36.1) | 16.5  | (13.9-19.4) | 100 | 83.5  | (80.6-86.1) |
| Did not receive 1+ flu                                      | 2412 | *16.4 | (14.2-18.8) | 37.0  | (33.5-40.5) | *46.6 | (43.0-50.2) | 100 | *53.4 | (49.8-57.0) |
| <b>Urban-Rural Residence<sup>f</sup></b>                    |      |       |             |       |             |       |             |     |       |             |
| Urban (MSA, principal city) (Referent)                      | 1810 | 34.3  | (30.3-38.5) | 39.0  | (34.4-43.6) | 26.8  | (22.7-31.1) | 100 | 73.2  | (68.9-77.3) |
| Suburban (MSA, non-principal city)                          | 2570 | 31.6  | (28.7-34.5) | 34.3  | (30.9-37.7) | *34.2 | (30.8-37.7) | 100 | *65.8 | (62.3-69.2) |
| Rural (non-MSA)                                             | 956  | *16.6 | (12.8-21.0) | *29.9 | (23.9-36.4) | *53.5 | (46.9-60.0) | 100 | *46.5 | (40.0-53.1) |
| <b>SVI of County of Residence<sup>e</sup></b>               |      |       |             |       |             |       |             |     |       |             |
| Low SVI (Referent)                                          | 1901 | 36.2  | (32.6-40.0) | 34.3  | (30.0-38.8) | 29.5  | (25.6-33.6) | 100 | 70.5  | (66.4-74.4) |
| Moderate SVI                                                | 1875 | *29.3 | (26.0-32.9) | 34.1  | (30.2-38.1) | *36.6 | (32.5-40.8) | 100 | *63.4 | (59.2-67.5) |
| High SVI                                                    | 1435 | *27.4 | (23.5-31.6) | 37.1  | (32.3-42.0) | 35.5  | (30.8-40.5) | 100 | 64.5  | (59.5-69.2) |
| <b>Political Leaning of County of Residence<sup>h</sup></b> |      |       |             |       |             |       |             |     |       |             |
| Republican leaning                                          | 1637 | *17.3 | (14.6-20.3) | 35.0  | (30.9-39.2) | *47.7 | (43.4-52.0) | 100 | *52.3 | (48.0-56.6) |
| Not leaning (referent)                                      | 1183 | 28.5  | (24.3-32.9) | 38.0  | (32.7-43.6) | 33.5  | (28.4-38.9) | 100 | 66.5  | (61.1-71.6) |
| Democrat leaning                                            | 2385 | *41.9 | (38.2-45.7) | 33.7  | (29.8-37.7) | *24.4 | (20.8-28.3) | 100 | *75.6 | (71.7-79.2) |
| <b>HHS Region</b>                                           |      |       |             |       |             |       |             |     |       |             |
| Region I: CT,ME,MA,NH,RI,VT (Referent)                      | 675  | 49.8  | (42.7-56.9) | 25.6  | (19.5-32.5) | 24.6  | (18.5-31.5) | 100 | 75.4  | (68.5-81.5) |
| Region II: NJ,NY,PR,VI                                      | 401  | *43.3 | (35.3-51.6) | 32.2  | (24.3-40.9) | 24.5  | (17.2-33.1) | 100 | 75.5  | (66.9-82.8) |
| Region III: DE,DC,MD,PA,VA,WV                               | 716  | *36.8 | (31.1-42.7) | 29.6  | (23.8-36.0) | *33.6 | (27.4-40.2) | 100 | *66.4 | (59.8-72.6) |
| Region IV: AL,FL,GA,KY,MS,NC,SC,TN                          | 849  | *20.4 | (16.8-24.4) | *42.4 | (36.7-48.2) | *37.2 | (31.9-42.9) | 100 | *62.8 | (57.1-68.1) |
| Region V: IL,IN,MI,MN,OH,WI                                 | 559  | *30.1 | (25.3-35.3) | 34.0  | (27.7-40.8) | *35.9 | (29.3-42.8) | 100 | *64.1 | (57.2-70.7) |
| Region VI: AR,LA,NM,OK,TX                                   | 667  | *26.4 | (21.7-31.5) | *37.3 | (31.3-43.6) | *36.3 | (30.3-42.7) | 100 | *63.7 | (57.3-69.7) |
| Region VII: IA,KS,MO,NE                                     | 341  | *24.9 | (19.8-30.6) | 30.2  | (23.1-38.0) | *44.9 | (36.9-53.1) | 100 | *55.1 | (46.9-63.1) |
| Region VIII: CO,MT,ND,SD,UT,WY                              | 544  | *31.7 | (25.7-38.2) | *36.3 | (29.1-44.1) | 31.9  | (25.2-39.2) | 100 | 68.1  | (60.8-74.8) |
| Region IX: AZ,CA,HI,NV,GU                                   | 367  | *35.4 | (27.1-44.4) | 33.4  | (24.8-42.9) | 31.2  | (22.7-40.7) | 100 | 68.8  | (59.3-77.3) |
| Region X: AK,ID,OR,WA                                       | 319  | *32.4 | (24.7-41.0) | 35.7  | (26.6-45.6) | 31.9  | (23.4-41.3) | 100 | 68.1  | (58.7-76.6) |

CI=Confidence Interval; SVI=Social Vulnerability Index

<sup>a</sup> Sample sizes, n, are unweighted but percentages are weighted as described in the methods.

<sup>b</sup> Race of child was reported by parent/guardian respondent. Children of Hispanic ethnicity might be of any race. Children identified as multiple races had more than one race category selected. Other race included American Indian/Alaska Native and Native Hawaiian/other Pacific Islander.

<sup>c</sup> Income/Poverty level was defined based on total family income in the past calendar year, and the U.S. Census poverty thresholds for that year specified for the applicable family size and number of children <18 years. Poverty thresholds are available at <https://www.census.gov/data/tables/time-series/demo/income-poverty/historical-poverty-thresholds.html>.

<sup>d</sup>Non-Medicaid insurance includes Private, Child Health Insurance Program (CHIP), Indian Health Service (IHS), Military, or any other insurance and could not be ungrouped due to the nature of the survey questions.

<sup>e</sup>Based on parent report and not confirmed by COVID-19 testing.

<sup>f</sup>Based on respondent reported zip code of residence.

<sup>g</sup>The CDC/ATSDR Social Vulnerability Index was developed, using 15 U.S. census variables, to help officials identify communities that may need support before, during, or after disasters. Categorization of NIS-CCM data into an SVI level was based on zip code of residence reported by the respondent. Details on the SVI are available at

<https://www.atsdr.cdc.gov/placeandhealth/svi/index.html> .

<sup>h</sup> Political leaning of the county of residence of the child was defined as follows. Counties in the United States were group together as Republican leaning, Democrat leaning, or neither Republican leaning nor Democrat leaning. Publicly available data obtained from news organizations reporting on the 2020 presidential election was use to classify counties. All counties were sorted by the percent of vote for the Democratic presidential candidate. The top third with the most votes for the Democratic candidate were considered Democrat leaning, the bottom third with the least votes for the Democratic candidate were considered Republican leaning, and the final middle group was considered neither Republican leaning nor Democrat leaning.

<sup>i</sup>Statistically significant at  $P < 0.05$  compared to the referent group (shaded rows).

**Table 2. Sociodemographic Variation in Behavioral and Social Drivers for COVID-19 Vaccination, Among Unvaccinated Children Ages 5–11 years With Parents Who Definitely/Probably/Unsure Will Get the Child Vaccinated, United States, February 2022, National Immunization Survey-Child COVID Module (NIS-CCM)**

|                                                    |                | Unvaccinated Children with Parents Open to Vaccination (Definitely/Probably/Unsure Will Get the Child Vaccinated) |                                    |                              |                                                   |                                                 |                                               |  |
|----------------------------------------------------|----------------|-------------------------------------------------------------------------------------------------------------------|------------------------------------|------------------------------|---------------------------------------------------|-------------------------------------------------|-----------------------------------------------|--|
| Characteristic                                     | n <sup>a</sup> | Concerned about child getting COVID                                                                               | Importance of vaccine for children | Confidence in vaccine safety | Friends/ family had children ages 5–11 vaccinated | Provider recommended COVID-19 vaccine for child | Had difficulty trying to get child vaccinated |  |
|                                                    |                | (% Moderately or very concerned)                                                                                  | (% Somewhat or very important)     | (% Very or completely safe)  | (% Almost all or many)                            | (% Yes)                                         | (% Yes)                                       |  |
|                                                    |                | % (95% CI)                                                                                                        | % (95% CI)                         | % (95% CI)                   | % (95% CI)                                        | % (95% CI)                                      | % (95% CI)                                    |  |
| <b>Overall</b>                                     | 1184           | 54.7 (50.1-59.2)                                                                                                  | 77.6 (73.5-81.3)                   | 38.3 (33.5-43.4)             | 16.0 (12.7-19.8)                                  | 24.0 (20.4-27.9)                                | 17.8 (14.4-21.6)                              |  |
| <b>Child's Age Group</b>                           |                |                                                                                                                   |                                    |                              |                                                   |                                                 |                                               |  |
| 5–6 years (Referent)                               | 355            | 54.4 (46.2-62.4)                                                                                                  | 75.0 (66.6-82.2)                   | 38.7 (30.1-47.8)             | 17.4 (11.9-24.1)                                  | 26.3 (19.7-33.9)                                | 17.7 (11.5-25.5)                              |  |
| 7–8 years                                          | 321            | 53.9 (44.7-63.0)                                                                                                  | 81.6 (73.7-88.0)                   | 40.6 (30.9-50.9)             | 15.3 (9.1-23.4)                                   | 23.0 (16.8-30.2)                                | 23.7 (16.2-32.5)                              |  |
| 9–11 years                                         | 508            | 55.3 (48.2-62.2)                                                                                                  | 76.9 (70.5-82.4)                   | 36.9 (29.6-44.7)             | 15.5 (10.4-21.9)                                  | 23.2 (17.6-29.5)                                | 14.4 (10.1-19.6)                              |  |
| <b>Child's Race/Ethnicity<sup>b</sup></b>          |                |                                                                                                                   |                                    |                              |                                                   |                                                 |                                               |  |
| Hispanic                                           | 266            | *58.4 (49.1-67.4)                                                                                                 | 79.1 (69.7-86.7)                   | *29.7 (21.1-39.4)            | 17.9 (11.3-26.4)                                  | 18.3 (12.7-25.1)                                | 18.0 (11.1-26.7)                              |  |
| Black, non-Hispanic                                | 187            | *67.8 (57.4-77.1)                                                                                                 | *88.2 (79.6-94.1)                  | 36.1 (24.8-48.6)             | 15.7 (8.5-25.6)                                   | 28.0 (19.1-38.4)                                | 17.8 (10.9-26.7)                              |  |
| White, non-Hispanic (Referent)                     | 579            | 44.1 (37.7-50.7)                                                                                                  | 71.3 (65.2-77.0)                   | 45.2 (38.0-52.5)             | 15.4 (10.8-21.0)                                  | 25.3 (19.9-31.3)                                | 18.1 (13.3-23.7)                              |  |
| Asian, Other, Multiple, non-Hispanic               | 152            | *61.0 (46.9-73.9)                                                                                                 | 76.7 (62.6-87.4)                   | -- --                        | 12.7 (6.1-22.5)                                   | 29.4 (17.4-44.0)                                | -- --                                         |  |
| <b>Child's Sex</b>                                 |                |                                                                                                                   |                                    |                              |                                                   |                                                 |                                               |  |
| Male (Referent)                                    | 595            | 55.0 (48.6-61.2)                                                                                                  | 78.9 (73.0-84.0)                   | 41.3 (34.3-48.6)             | 18.6 (13.9-24.1)                                  | 25.2 (20.1-30.8)                                | 13.8 (9.8-18.7)                               |  |
| Female                                             | 589            | 54.4 (47.7-60.9)                                                                                                  | 76.3 (70.2-81.6)                   | 35.6 (28.9-42.7)             | 13.5 (9.0-19.2)                                   | 22.9 (18.0-28.5)                                | *21.7 (16.5-27.8)                             |  |
| <b>Household Income/Poverty Level<sup>c</sup></b>  |                |                                                                                                                   |                                    |                              |                                                   |                                                 |                                               |  |
| >Poverty, >\$75,000/year (Referent)                | 432            | 52.4 (44.5-60.1)                                                                                                  | 74.1 (66.6-80.7)                   | 47.3 (38.7-55.9)             | 18.0 (12.0-25.3)                                  | 30.4 (23.7-37.8)                                | 17.1 (10.9-24.9)                              |  |
| >Poverty, ≤\$75,000/year                           | 366            | 48.1 (39.9-56.4)                                                                                                  | 74.0 (65.6-81.4)                   | *35.3 (27.2-44.0)            | 11.8 (7.5-17.4)                                   | *20.4 (14.5-27.5)                               | 16.5 (11.0-23.2)                              |  |
| At or below poverty level                          | 143            | 65.4 (53.1-76.3)                                                                                                  | *89.8 (81.4-95.3)                  | 33.0 (20.8-47.1)             | 19.3 (11.0-30.4)                                  | 20.1 (12.2-30.3)                                | 18.5 (11.0-28.2)                              |  |
| Income not reported                                | 243            | 58.4 (48.3-68.1)                                                                                                  | 77.7 (68.0-85.6)                   | *33.5 (22.8-45.5)            | 16.1 (8.5-26.5)                                   | 22.4 (15.0-31.3)                                | 20.0 (12.7-29.1)                              |  |
| <b>Mother's Education Level</b>                    |                |                                                                                                                   |                                    |                              |                                                   |                                                 |                                               |  |
| ≤ High school or equivalent (Referent)             | 396            | 63.2 (56.0-70.1)                                                                                                  | 81.0 (74.2-86.6)                   | 30.3 (23.0-38.4)             | 13.5 (8.6-19.8)                                   | 18.3 (13.3-24.3)                                | 18.4 (13.0-24.9)                              |  |
| Some college/vocational school                     | 345            | *47.3 (39.2-55.6)                                                                                                 | 76.3 (68.7-82.8)                   | 38.6 (29.8-48.1)             | 15.3 (10.4-21.2)                                  | 26.3 (19.5-34.1)                                | 18.5 (12.5-25.9)                              |  |
| ≥ College degree                                   | 443            | *48.9 (40.9-56.9)                                                                                                 | 73.5 (65.5-80.6)                   | *50.4 (41.7-59.1)            | 20.8 (13.9-29.3)                                  | *30.7 (23.9-38.3)                               | 16.0 (10.5-23.0)                              |  |
| <b>Number of Children Under 18</b>                 |                |                                                                                                                   |                                    |                              |                                                   |                                                 |                                               |  |
| 1 child (Referent)                                 | 423            | 59.8 (51.5-67.8)                                                                                                  | 77.7 (68.4-85.3)                   | 32.9 (24.8-41.9)             | 14.6 (9.8-20.6)                                   | 25.8 (19.1-33.5)                                | 23.2 (15.9-32.0)                              |  |
| 2+ children                                        | 761            | 52.9 (47.5-58.3)                                                                                                  | 77.6 (72.9-81.8)                   | 40.2 (34.4-46.2)             | 16.5 (12.4-21.3)                                  | 23.4 (19.3-28.0)                                | 15.9 (12.3-20.2)                              |  |
| <b>Health Insurance<sup>d</sup></b>                |                |                                                                                                                   |                                    |                              |                                                   |                                                 |                                               |  |
| Non-Medicaid insurance (Referent)                  | 731            | 49.0 (43.0-55.0)                                                                                                  | 73.7 (67.8-79.0)                   | 41.9 (35.5-48.5)             | 15.5 (11.4-20.4)                                  | 25.8 (21.0-31.1)                                | 18.3 (13.7-23.8)                              |  |
| Medicaid or Uninsured                              | 404            | *61.0 (53.3-68.2)                                                                                                 | *83.7 (77.7-88.7)                  | *31.9 (24.4-40.3)            | 16.5 (11.0-23.4)                                  | 21.0 (15.7-27.2)                                | 16.3 (11.6-22.0)                              |  |
| <b>Child ever had COVID-19 illness<sup>e</sup></b> |                |                                                                                                                   |                                    |                              |                                                   |                                                 |                                               |  |
| Yes (Referent)                                     | 456            | 51.4 (43.8-59.0)                                                                                                  | 76.4 (68.9-82.9)                   | 39.3 (31.3-47.7)             | 15.4 (10.2-21.8)                                  | 31.6 (24.9-38.9)                                | 16.9 (11.2-24.1)                              |  |
| No                                                 | 710            | 57.3 (51.4-63.1)                                                                                                  | 79.0 (74.0-83.5)                   | 38.0 (31.8-44.5)             | 16.6 (12.3-21.7)                                  | *19.5 (15.5-24.1)                               | 18.1 (14.0-22.8)                              |  |
| <b>Flu vaccination received since July 1, 2021</b> |                |                                                                                                                   |                                    |                              |                                                   |                                                 |                                               |  |

|                                                               |     |                   |                  |                   |                  |                   |                  |
|---------------------------------------------------------------|-----|-------------------|------------------|-------------------|------------------|-------------------|------------------|
| Received 1+ Flu (Referent)                                    | 485 | 57.9 (50.8-64.9)  | 78.9 (72.2-84.7) | 42.3 (34.6-50.3)  | 20.4 (15.0-26.7) | 31.9 (25.7-38.6)  | 16.8 (12.0-22.7) |
| Did not receive 1+ Flu                                        | 659 | 52.0 (45.9-58.2)  | 76.5 (70.9-81.5) | 35.4 (29.1-42.2)  | 13.2 (9.1-18.4)  | *18.5 (14.3-23.3) | 18.3 (13.7-23.6) |
| <b>Urban-Rural Residence<sup>f</sup></b>                      |     |                   |                  |                   |                  |                   |                  |
| Urban (MSA, principal city) (Referent)                        | 403 | 54.8 (46.8-62.6)  | 77.4 (70.1-83.7) | 32.7 (25.1-41.1)  | 15.3 (10.4-21.4) | 18.9 (14.0-24.6)  | 17.5 (12.1-24.0) |
| Suburban (MSA, non-principal city)                            | 577 | 54.4 (48.1-60.6)  | 77.2 (71.3-82.4) | *44.3 (37.4-51.4) | 17.8 (12.8-23.6) | *27.3 (22.0-33.2) | 17.3 (12.6-22.8) |
| Rural (non-MSA)                                               | 201 | 54.4 (41.4-67.0)  | 79.4 (67.3-88.6) | 29.0 (17.1-43.5)  | -- --            | 26.0 (15.5-39.0)  | 19.3 (10.5-31.0) |
| <b>SVI of County of Residence<sup>g</sup></b>                 |     |                   |                  |                   |                  |                   |                  |
| Low SVI (Referent)                                            | 340 | 48.0 (39.4-56.8)  | 81.0 (74.0-86.8) | 47.2 (37.6-57.0)  | 18.6 (11.6-27.5) | 29.8 (22.4-38.2)  | 20.6 (13.8-28.9) |
| Moderate SVI                                                  | 440 | 52.3 (45.0-59.6)  | 73.4 (66.7-79.5) | 42.2 (34.3-50.5)  | 14.7 (10.3-20.1) | *19.8 (14.5-26.0) | 13.6 (9.3-19.1)  |
| High SVI                                                      | 372 | *61.0 (52.8-68.9) | 80.7 (72.7-87.3) | *29.7 (22.1-38.3) | 16.4 (10.6-23.8) | 25.0 (18.8-32.1)  | 17.2 (11.9-23.7) |
| <b>Political Leaning of County of Residence<sup>h,i</sup></b> |     |                   |                  |                   |                  |                   |                  |
| Republican leaning                                            | 445 | 50.6 (43.1-58.1)  | 76.2 (69.4-82.2) | 35.2 (27.4-43.6)  | 11.7 (7.5-17.0)  | 21.8 (15.8-28.9)  | 17.1 (12.0-23.3) |
| Not leaning (referent)                                        | 271 | 48.1 (38.5-57.8)  | 78.9 (70.3-86.0) | 45.6 (34.6-56.9)  | 14.9 (8.8-23.1)  | 20.0 (14.0-27.1)  | 14.0 (8.0-22.2)  |
| Democrat leaning                                              | 436 | *61.3 (54.0-68.3) | 79.1 (72.2-85.0) | 38.2 (30.6-46.3)  | 21.3 (15.1-28.6) | *29.5 (23.2-36.4) | 18.6 (13.4-24.7) |

CI=Confidence Interval; SVI=Social Vulnerability Index -- indicates an estimate that was suppressed because it did not meet the NCHS reliability of proportions criteria

<sup>a</sup> Sample sizes, n, are unweighted but percentages are weighted as described in the methods.

<sup>b</sup> Race of child was reported by parent/guardian respondent. Children of Hispanic ethnicity might be of any race. Children identified as multiple races had more than one race category selected. Other race included American Indian/Alaska Native and Native Hawaiian/other Pacific Islander.

<sup>c</sup> Income/Poverty level was defined based on total family income in the past calendar year, and the U.S. Census poverty thresholds for that year specified for the applicable family size and number of children <18 years. Poverty thresholds are available at <https://www.census.gov/data/tables/time-series/demo/income-poverty/historical-poverty-thresholds.html>.

<sup>d</sup> Non-Medicaid insurance includes Private, Child Health Insurance Program (CHIP), Indian Health Service (IHS), Military, or any other insurance and could not be ungrouped due to the nature of the survey questions. Uninsured was combined with Medicaid insured for this table due to small sample size.

<sup>e</sup> Based on parent report and not confirmed by COVID-19 testing.

<sup>f</sup> Based on respondent reported zip code of residence.

<sup>g</sup> The CDC/ATSDR Social Vulnerability Index was developed, using 15 U.S. census variables, to help officials identify communities that may need support before, during, or after disasters.

Categorization of NIS-CCM data into an SVI level was based on zip code of residence reported by the respondent. Details on the SVI are available at

<https://www.atsdr.cdc.gov/placeandhealth/svi/index.html>.

<sup>h</sup> Political leaning of the county of residence of the child was defined as follows. Counties in the United States were group together as Republican leaning, Democrat leaning, or neither Republican leaning nor Democrat leaning. Publicly available data obtained from news organizations reporting on the 2020 presidential election was used to classify counties. All counties were sorted by the percent of vote for the Democratic presidential candidate. The top third with the most votes for the Democratic candidate were considered Democrat leaning, the bottom third with the least votes for the Democratic candidate were considered Republican leaning, and the final middle group was considered neither Republican leaning nor Democrat leaning.

<sup>i</sup> Due to the smaller sample size for this table because it is a subset of Table 1, some groups showed in more detail in Table 1 needed to be collapsed to produce reliable estimates and HHS region was omitted because of the smaller samples size for this table.

\* Statistically significant at P<0.05 compared to the referent group (shaded rows).

**Figure 1. COVID-19 Vaccination Status ( $\geq 1$  dose) and Parental Intent to Have the Child Vaccinated, by Month of Interview, Children Ages 5–11 Years, November 2021–February 2022, United States, National Immunization Survey-Child COVID Module (NIS-CCM)**

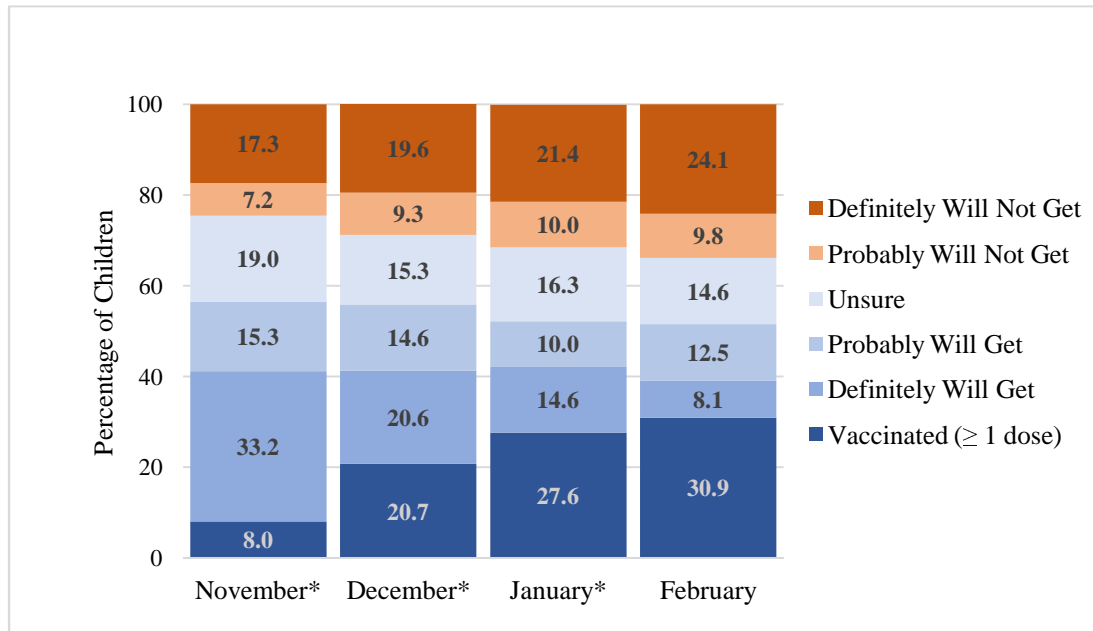

\*Estimates from COVIDVaxView: <https://www.cdc.gov/vaccines/imz-managers/coverage/covidvaxview/index.html>

**Figure 2. Behavioral and Social Drivers Associated with COVID-19 Vaccination, by Vaccination Status ( $\geq 1$  Dose) and Intention of Parents to Vaccinate Children Ages 5–11 years, February 2022, United States, National Immunization Survey-Child COVID Module (NIS-CCM)**

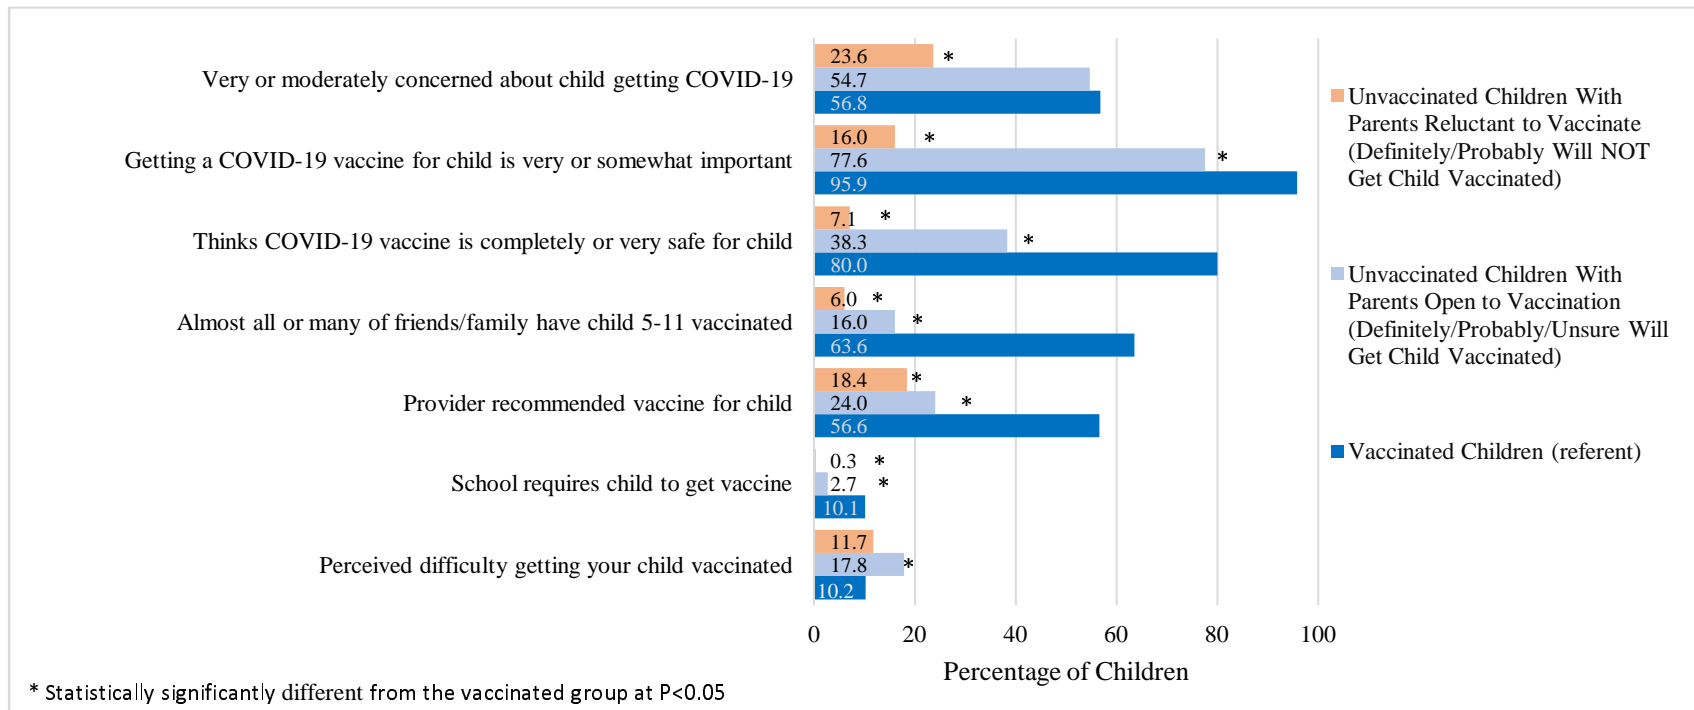

Source: https://www.medrxiv.org/content/10.1101/2022.06.24.22276865.full.pdf
